# Supplementary material
Source: publisher site journal article supplement (https://www.dovepress.com/article/440895)
Supplement: Supplementary file 1 [file get_supplementary_file.php]

**Supplementary file**

**Table S1. Commonly prescribed, concomitant medications that have clinically relevant drug-drug interactions with NMV-r**

| **Group 1** | **Group 2** | **Group 3** |
| --- | --- | --- |
| Anticonvulsants | Anticoagulants | Anticoagulants |
| Carbamazepine  Phenobarbital  Phenytoin  Primidone | Rivaroxaban | Apixaban  Dabigatran  Edoxaban |
| Anti-Infectives | Anti-Infectives | Anti-Infectives |
| Glecaprevir/pibrentasvir  Rifampin  Rifapentine | Erythromycin | Clarithromycin  Itraconazole  Ketoconazole  Maraviroc  Rifabutin |
| Immunosuppressants | Immunosuppressants | Immunosuppressants |
| Voclosporin | Everolimus  Sirolimus  Tacrolimus | Cyclosporine  Dexamethasone  Fedratinib  Ruxolitinib  Tofacitinib  Upadacitinib |
| Cardiovascular | Cardiovascular | Cardiovascular |
| Amiodarone  Clopidogrel  Disopyramide  Dofetilide  Dronedarone  Eplerenone  Flecainide  Ivabradine  Propafenone  Quinidine | Aliskiren  Ranolazine  Ticagrelor  Vorapaxar | Cilostazol  Digoxin  Amlodipine  Diltiazem  Felodipine  Nifedipine  Verapamil |
| Neuropsychiatric | Neuropsychiatric | Neuropsychiatric |
| Clozapine  Lurasidone  Midazolam (oral)  Pimozide | Suvorexant  Triazolam | Alprazolam  Aripiprazole  Brexpiprazole  Buspirone  Cariprazine  Chlordiazepoxide  Clobazam  Clonazepam  Clorazepate  Diazepam  Estazolam  Flurazepam  Iloperidone  Lumateperone  Pimavanserin  Quetiapine  Trazodone |
| Pulmonary Hypertension | For Erectile Dysfunction | For Erectile Dysfunction |
| Sildenafil  Tadalafil  Vardenafil | Avanafil | Sildenafil  Tadalafil  Vardenafil |
| Miscellaneous | Lipid-modifiers | Pulmonary Hypertension |
| Bosentan  Ergot derivatives  Lumacaftor/ivacaftor  St. John’s wort  Tolvaptan | Atorvastatin  Lomitapide  Lovastatin  Rosuvastatin  Simvastatin | Riociguat |
| Respiratory | DPP4 inhibitor |
| Salmeterol | Saxagliptin |
| Miscellaneous | For pain |
| Colchicine  Finerenone  Flibanserin  Naloxegol | Fentanyl  Hydrocodone  Oxycodone |
| For lower urinary tract symptoms | For lower urinary tract symptoms |
| Alfuzosin  Silodosin | Tamsulosin |
| For Migraine | For Migraine |
| Eletriptan  Rimegepant  Ubrogepant | Almotriptan |
| Miscellaneous |
| Darifenacin  Elexacaftor/ tezacaftor/ivacaftor  Eluxadoline  Ivacaftor  Solifenacin  Tezacaftor/ivacaftor |

The drugs are categorized into three groups according to recommended management strategies: group 1, prescribe alternative COVID-19 therapy; group 2, temporarily withhold concomitant medication, if clinically appropriate; and group 3, adjust concomitant medication dose and monitor for adverse effects (adopted from NIH COVID-19 treatment guidelines <https://www.covid19treatmentguidelines.nih.gov/>, accessed on 5 July 2023).

**Table S2: Sensitivity analysis on the effectiveness of early Nirmatrelvir-ritonivir vs molnupiravir in preventing COVID-19 related respiratory failure and mortality**

|  | **% (No. of cases/no. in group)** | | **Nirmatrelvir-**  **ritonavir vs Molnupiravir** | |
| --- | --- | --- | --- | --- |
|  | NMV-r  (n = 704) | MOL  (n = 574) |  | |
|  |  | | OR | aOR |
| COVID-19 related  respiratory failure | 54 (7.7%) | 58 (10.1%) | 0.739 (95% CI = 0.501 – 1.090), p = 0.127 | 0.817 (95% CI = 0.582 – 1.532), p = 0.735 |
| COVID-19 related severe respiratory failure | 13 (1.8%) | 14 (2.4%) | 0.753 (95% CI = 0.351 – 1.614), p = 0.465 | 0.678 (95% CI = 0.262 – 1.752), p = 0.422 |
| In-hospital mortality | 4 (0.6%) | 16 (2.8%) | 0.199 (95% CI = 0.066 – 0.599), p < 0.001* | 0.290 (95% CI = 0.087 – 0.968), p = 0.044* |
| 90 days mortality | 23 (3.3%) | 52 (9.1%) | 0.339 (95% CI = 0.205 – 0.561), p < 0.001* | 0.566 (95% CI = 0.326 – 0.985), p = 0.044* |

Early treatment defined as initiation of anti-viral within 5 days of admission

*P <0.05

The odd ratios were adjusted for age (<70 or > 70), gender, Charlson co-morbidity index (<5 or > 5), time from admission to initiation of antiviral (<3 or >3 days), degree of renal impairment, concomitant Group 1 to 3 medication and underlying respiratory diagnosis; all as categorical variables

**Table S3: Sensitivity analysis on the effectiveness of early Nirmatrelvir-ritonivir vs molnupiravir in reducing length of stay**

|  | **NMV-r**  **(n = 704)** | | **MOL**  **(n = 574)** | **p-value in univariate analysis** | **p-value in multivariate analysis** |
| --- | --- | --- | --- | --- | --- |
| LOS (Days), Median [IQR] | 4 [2 - 7] | 6 [3 - 9] | | < 0.001* | 0.004* |

Early treatment defined as initiation of anti-viral within 5 days of admission

*P <0.05

The odd ratios were adjusted for age (<70 or > 70), gender, Charlson co-morbidity index (<5 or > 5), time from admission to initiation of antiviral (<3 or >3 days), degree of renal impairment, concomitant Group 1 to 3 medication and underlying respiratory diagnosis; all as categorical variables

**Figure S1. Sensitivity analysis -Survival analysis for subgroup with early use of anti-viral**

**
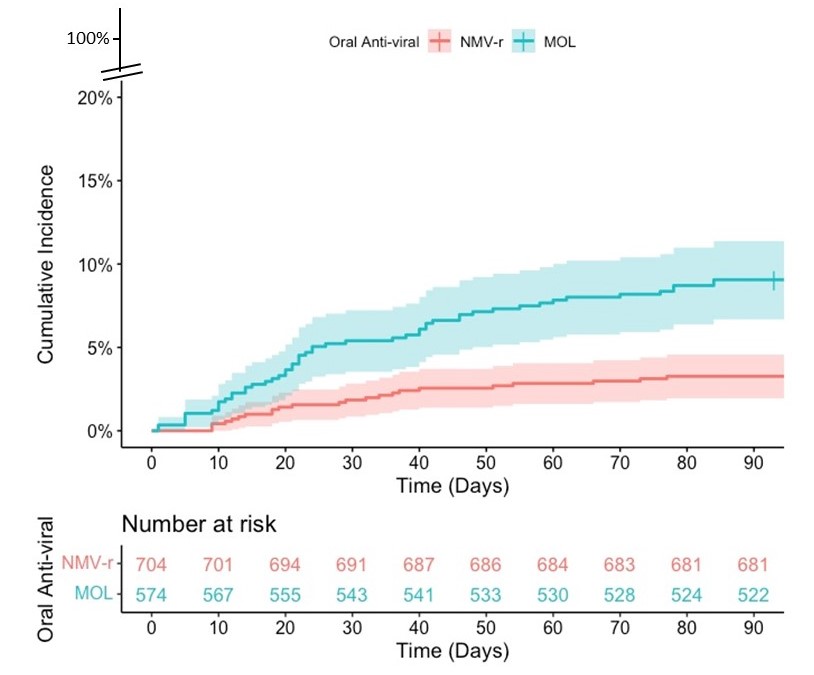
**

Early treatment defined as initiation of anti-viral within 5 days of admission.

HR = 0.350 (95% CI = 0.214 – 0.572), p < 0.001

aHR = 0.565 (95% CI = 0.333 – 0.959), p = 0.034

HR = Hazard ratio, aHR = Adjusted hazard ratio, CI = Confidence interval

The odd ratios were adjusted for age (<70 or > 70), gender, Charlson co-morbidity index (<5 or > 5), time from admission to initiation of antiviral (<3 or >3 days), degree of renal impairment, concomitant Group 1 to 3 medication and underlying respiratory diagnosis; all as categorical variables
